# Supplementary material for: Pattern of New Gene Origination in a Special Fish Lineage, the Flatfishes
Source: MDPI journal article supplement (doi:10.3390/genes12111819), 2021-11-19
Supplement: s1 [file s1]

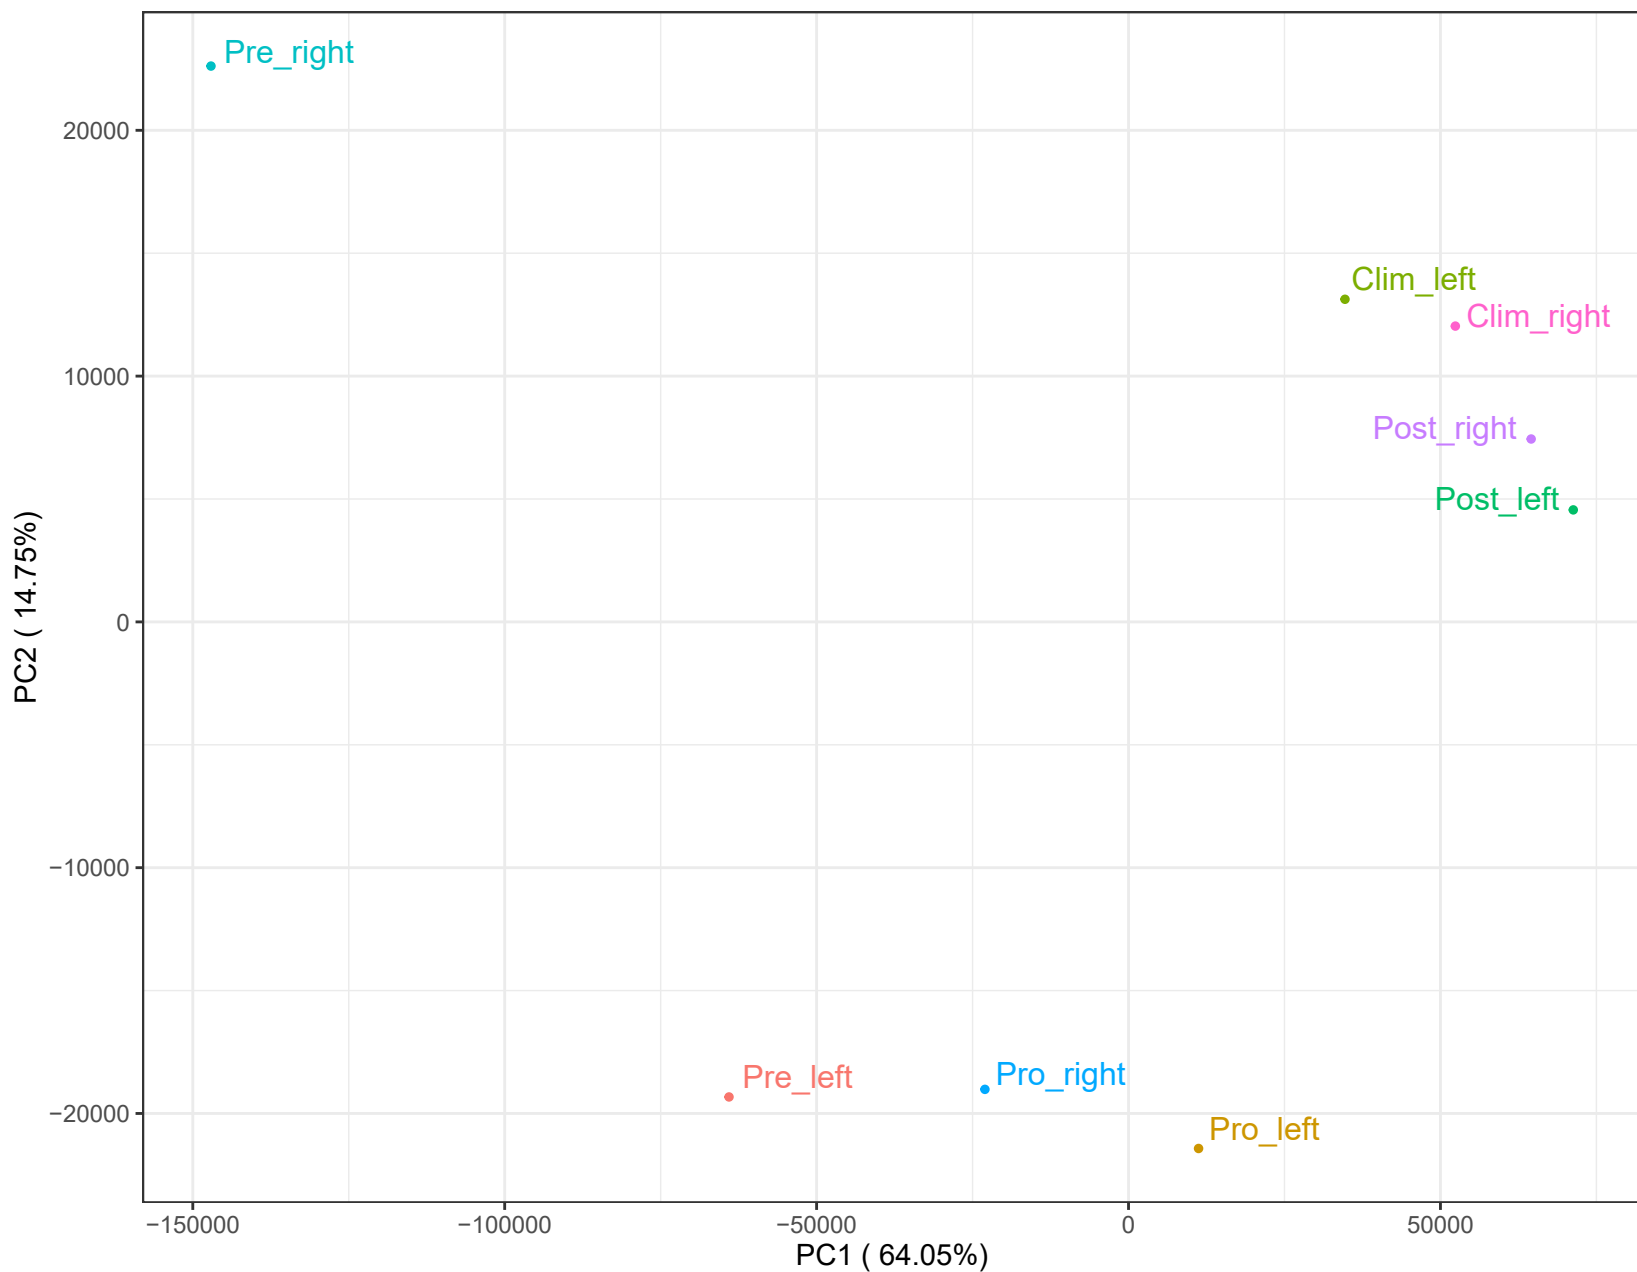

**Figure S2.** The Principal Component Analysis (PCA) plot of muscle expression profiles of different samples of the Japanese flounder, including left and right side at different development stages. Pre, pre-metamorphic larva; Pro, pro-metamorphic larva; Clim, metamorphic climax larva; Post, post-metamorphic larva.
