# Supplementary material for: Pattern of New Gene Origination in a Special Fish Lineage, the Flatfishes
Source: MDPI journal article supplement (doi:10.3390/genes12111819), 2021-11-19
Supplement: s1 [file s1]

**Table S2.** The branch and number of genes in starry flounder.

| Branch | Gene number |
|--------|-------------|
| -1     | 3750        |
| 0      | 16803       |
| 1      | 48          |
| 2      | 6           |
| 3      | 47          |
| 4      | 147         |
| 5      | 1341        |
