# Supplementary material for: Pattern of New Gene Origination in a Special Fish Lineage, the Flatfishes
Source: MDPI journal article supplement (doi:10.3390/genes12111819), 2021-11-19
Supplement: s1 [file s1]

**Table S1.** New genes with significant differential expression between the left and right sides.

| High expression side | Gene ID                  | Gene name          | P-value  | Log <sub>2</sub> FoldChange |
|----------------------|--------------------------|--------------------|----------|-----------------------------|
| Right                | evm.model.Hic_chr_16.3   | <i>Nlrc3-like</i>  | 5.23e-06 | -28.57                      |
| Right                | evm.model.Hic_chr_17.469 | <i>Ugt1a2</i>      | 7.82e-05 | -4.84                       |
| Right                | evm.model.Hic_chr_10.487 | <i>Smarcad1</i>    | 1.57e-03 | -4.34                       |
| Right                | evm.model.Hic_chr_18.213 | <i>Hipk1</i>       | 2.17e-03 | -4.06                       |
| Right                | evm.model.Hic_chr_14.418 | <i>Ttc21b</i>      | 5.14e-03 | -3.78                       |
| Right                | evm.model.Hic_chr_15.251 | <i>Trim25</i>      | 5.47e-03 | -1.14                       |
| Left                 | evm.model.Hic_chr_8.550  | <i>S100a5-like</i> | 1.54e-05 | 3.89                        |
| Left                 | evm.model.Hic_chr_6.523  | -                  | 4.27e-05 | 3.42                        |
| Left                 | evm.model.Hic_chr_11.402 | <i>Fel</i>         | 1.27e-04 | 2.41                        |
