# Supplementary material for: Pattern of New Gene Origination in a Special Fish Lineage, the Flatfishes
Source: Genes (Basel). 2021 Nov 19;12(11):1819. doi: 10.3390/genes12111819 (PMC8618825; doi:10.3390/genes12111819)
Supplement: Supplementary file 1 [file genes-12-01819-s001.zip]

Archive with 5 entries (5 files):
- genes-1455005-supplementary/Figure S1.pdf
- genes-1455005-supplementary/Figure S2.pdf
- genes-1455005-supplementary/Table S1.pdf
- genes-1455005-supplementary/Table S2.pdf
- genes-1455005-supplementary/Table S3.xlsx
