# Supplementary material for: Pattern of New Gene Origination in a Special Fish Lineage, the Flatfishes
Source: Genes (Basel). 2021 Nov 19;12(11):1819. doi: 10.3390/genes12111819 (PMC8618825; doi:10.3390/genes12111819)
Supplement: Supplementary file 1 [file genes-12-01819-s001.zip › genes-1455005-supplementary/Table S3.xlsx]

## Sheet: list_1541
Table S3. The list of the 1,541 Pleuronectoidei-specific genes
evm.model.Hic_chr_23.6
evm.model.Hic_chr_23.32
evm.model.Hic_chr_23.80
evm.model.Hic_chr_3.62
evm.model.Hic_chr_19.1
evm.model.Hic_chr_19.4
evm.model.Hic_chr_1.112
evm.model.Hic_chr_1.119
evm.model.Hic_chr_1.147
evm.model.Hic_chr_1.148
evm.model.Hic_chr_1.227
evm.model.Hic_chr_1.228
evm.model.Hic_chr_1.260
evm.model.Hic_chr_10.5
evm.model.Hic_chr_10.7
evm.model.Hic_chr_10.8
evm.model.Hic_chr_10.22
evm.model.Hic_chr_22.22
evm.model.Hic_chr_6.3
evm.model.Hic_chr_6.5
evm.model.Hic_chr_6.6
evm.model.Hic_chr_6.7
evm.model.Hic_chr_9.66
evm.model.Hic_chr_9.179
evm.model.Hic_chr_9.181
evm.model.Hic_chr_9.278
evm.model.Hic_chr_9.293
evm.model.Hic_chr_9.416
evm.model.Hic_chr_1.267
evm.model.Hic_chr_10.62
evm.model.Hic_chr_10.90
evm.model.Hic_chr_10.91
evm.model.Hic_chr_10.98
evm.model.Hic_chr_10.126
evm.model.Hic_chr_10.128
evm.model.Hic_chr_10.183
evm.model.Hic_chr_10.184
evm.model.Hic_chr_10.192
evm.model.Hic_chr_10.196
evm.model.Hic_chr_10.241
evm.model.Hic_chr_10.244
evm.model.Hic_chr_10.249
evm.model.Hic_chr_1.269
evm.model.Hic_chr_16.49
evm.model.Hic_chr_16.82
evm.model.Hic_chr_16.96
evm.model.Hic_chr_13.9
evm.model.Hic_chr_13.25
evm.model.Hic_chr_13.38
evm.model.Hic_chr_13.45
evm.model.Hic_chr_13.88
evm.model.Hic_chr_13.89
evm.model.Hic_chr_13.90
evm.model.Hic_chr_13.91
evm.model.Hic_chr_6.8
evm.model.Hic_chr_6.9
evm.model.Hic_chr_6.10
evm.model.Hic_chr_20.72
evm.model.Hic_chr_20.99
evm.model.Hic_chr_15.3
evm.model.Hic_chr_1.278
evm.model.Hic_chr_1.279
evm.model.Hic_chr_1.398
evm.model.Hic_chr_1.400
evm.model.Hic_chr_1.404
evm.model.Hic_chr_1.426
evm.model.Hic_chr_1.498
evm.model.Hic_chr_1.499
evm.model.Hic_chr_1.502
evm.model.Hic_chr_1.504
evm.model.Hic_chr_1.506
evm.model.Hic_chr_4.65
evm.model.Hic_chr_4.145
evm.model.Hic_chr_8.3
evm.model.Hic_chr_8.4
evm.model.Hic_chr_8.17
evm.model.Hic_chr_4.255
evm.model.Hic_chr_4.256
evm.model.Hic_chr_4.262
evm.model.Hic_chr_4.263
evm.model.Hic_chr_17.48
evm.model.Hic_chr_17.100
evm.model.Hic_chr_17.143
evm.model.Hic_chr_17.154
evm.model.Hic_chr_17.157
evm.model.Hic_chr_17.158
evm.model.Hic_chr_17.162
evm.model.Hic_chr_17.163
evm.model.Hic_chr_17.164
evm.model.Hic_chr_17.165
evm.model.Hic_chr_3.101
evm.model.Hic_chr_3.102
evm.model.Hic_chr_1.572
evm.model.Hic_chr_1.731
evm.model.Hic_chr_1.761
evm.model.Hic_chr_21.44
evm.model.Hic_chr_21.47
evm.model.Hic_chr_15.5
evm.model.Hic_chr_15.12
evm.model.Hic_chr_19.269
evm.model.Hic_chr_19.437
evm.model.Hic_chr_19.438
evm.model.Hic_chr_8.23
evm.model.Hic_chr_1.776
evm.model.Hic_chr_23.239
evm.model.Hic_chr_23.241
evm.model.Hic_chr_8.27
evm.model.Hic_chr_8.28
evm.model.Hic_chr_8.30
evm.model.Hic_chr_8.35
evm.model.Hic_chr_20.100
evm.model.Hic_chr_24.28
evm.model.Hic_chr_24.90
evm.model.Hic_chr_24.91
evm.model.Hic_chr_7.20
evm.model.Hic_chr_7.21
evm.model.Hic_chr_7.83
evm.model.Hic_chr_4.269
evm.model.Hic_chr_8.120
evm.model.Hic_chr_8.130
evm.model.Hic_chr_14.23
evm.model.Hic_chr_14.88
evm.model.Hic_chr_14.123
evm.model.Hic_chr_14.128
evm.model.Hic_chr_14.154
evm.model.Hic_chr_14.171
evm.model.Hic_chr_14.172
evm.model.Hic_chr_11.57
evm.model.Hic_chr_11.58
evm.model.Hic_chr_11.232
evm.model.Hic_chr_11.251
evm.model.Hic_chr_11.258
evm.model.Hic_chr_11.342
evm.model.Hic_chr_23.252
evm.model.Hic_chr_23.262
evm.model.Hic_chr_23.265
evm.model.Hic_chr_23.267
evm.model.Hic_chr_23.268
evm.model.Hic_chr_23.281
evm.model.Hic_chr_3.108
evm.model.Hic_chr_3.114
evm.model.Hic_chr_3.117
evm.model.Hic_chr_6.12
evm.model.Hic_chr_12.68
evm.model.Hic_chr_5.2
evm.model.Hic_chr_5.3
evm.model.Hic_chr_21.52
evm.model.Hic_chr_21.53
evm.model.Hic_chr_24.102
evm.model.Hic_chr_24.110
evm.model.Hic_chr_24.111
evm.model.Hic_chr_4.288
evm.model.Hic_chr_4.289
evm.model.Hic_chr_4.305
evm.model.Hic_chr_4.307
evm.model.Hic_chr_14.189
evm.model.Hic_chr_11.413
evm.model.Hic_chr_11.414
evm.model.Hic_chr_11.415
evm.model.Hic_chr_11.416
evm.model.Hic_chr_11.417
evm.model.Hic_chr_11.419
evm.model.Hic_chr_11.433
evm.model.Hic_chr_11.438
evm.model.Hic_chr_11.500
evm.model.Hic_chr_11.501
evm.model.Hic_chr_11.504
evm.model.Hic_chr_11.505
evm.model.Hic_chr_11.506
evm.model.Hic_chr_20.119
evm.model.Hic_chr_12.100
evm.model.Hic_chr_12.102
evm.model.Hic_chr_12.267
evm.model.Hic_chr_12.573
evm.model.Hic_chr_12.607
evm.model.Hic_chr_12.636
evm.model.Hic_chr_6.13
evm.model.Hic_chr_6.14
evm.model.Hic_chr_6.15
evm.model.Hic_chr_6.16
evm.model.Hic_chr_23.282
evm.model.Hic_chr_23.283
evm.model.Hic_chr_23.284
evm.model.Hic_chr_23.285
evm.model.Hic_chr_23.286
evm.model.Hic_chr_23.335
evm.model.Hic_chr_23.369
evm.model.Hic_chr_23.374
evm.model.Hic_chr_23.392
evm.model.Hic_chr_8.190
evm.model.Hic_chr_8.197
evm.model.Hic_chr_8.213
evm.model.Hic_chr_8.227
evm.model.Hic_chr_8.334
evm.model.Hic_chr_8.335
evm.model.Hic_chr_8.336
evm.model.Hic_chr_8.448
evm.model.Hic_chr_8.449
evm.model.Hic_chr_8.569
evm.model.Hic_chr_8.570
evm.model.Hic_chr_8.710
evm.model.Hic_chr_8.781
evm.model.Hic_chr_1.883
evm.model.Hic_chr_1.921
evm.model.Hic_chr_19.587
evm.model.Hic_chr_19.612
evm.model.Hic_chr_19.657
evm.model.Hic_chr_19.658
evm.model.Hic_chr_19.679
evm.model.Hic_chr_19.693
evm.model.Hic_chr_19.720
evm.model.Hic_chr_19.721
evm.model.Hic_chr_8.795
evm.model.Hic_chr_2.20
evm.model.Hic_chr_2.22
evm.model.Hic_chr_2.44
evm.model.Hic_chr_2.54
evm.model.Hic_chr_2.112
evm.model.Hic_chr_17.175
evm.model.Hic_chr_17.186
evm.model.Hic_chr_17.225
evm.model.Hic_chr_17.403
evm.model.Hic_chr_17.405
evm.model.Hic_chr_10.271
evm.model.Hic_chr_10.284
evm.model.Hic_chr_2.120
evm.model.Hic_chr_2.183
evm.model.Hic_chr_21.271
evm.model.Hic_chr_21.310
evm.model.Hic_chr_21.313
evm.model.Hic_chr_2.217
evm.model.Hic_chr_2.218
evm.model.Hic_chr_2.260
evm.model.Hic_chr_2.261
evm.model.Hic_chr_7.136
evm.model.Hic_chr_17.416
evm.model.Hic_chr_17.577
evm.model.Hic_chr_17.608
evm.model.Hic_chr_17.609
evm.model.Hic_chr_17.611
evm.model.Hic_chr_17.612
evm.model.Hic_chr_2.268
evm.model.Hic_chr_2.270
evm.model.Hic_chr_4.324
evm.model.Hic_chr_4.325
evm.model.Hic_chr_4.329
evm.model.Hic_chr_22.249
evm.model.Hic_chr_22.250
evm.model.Hic_chr_22.251
evm.model.Hic_chr_22.252
evm.model.Hic_chr_22.256
evm.model.Hic_chr_22.269
evm.model.Hic_chr_22.279
evm.model.Hic_chr_22.280
evm.model.Hic_chr_4.335
evm.model.Hic_chr_18.97
evm.model.Hic_chr_5.4
evm.model.Hic_chr_5.5
evm.model.Hic_chr_5.6
evm.model.Hic_chr_5.7
evm.model.Hic_chr_5.8
evm.model.Hic_chr_22.286
evm.model.Hic_chr_22.292
evm.model.Hic_chr_22.294
evm.model.Hic_chr_22.295
evm.model.Hic_chr_7.137
evm.model.Hic_chr_7.175
evm.model.Hic_chr_7.177
evm.model.Hic_chr_7.181
evm.model.Hic_chr_7.182
evm.model.Hic_chr_7.210
evm.model.Hic_chr_23.406
evm.model.Hic_chr_23.407
evm.model.Hic_chr_6.19
evm.model.Hic_chr_6.20
evm.model.Hic_chr_6.21
evm.model.Hic_chr_6.23
evm.model.Hic_chr_6.24
evm.model.Hic_chr_12.680
evm.model.Hic_chr_12.739
evm.model.Hic_chr_3.185
evm.model.Hic_chr_3.194
evm.model.Hic_chr_3.258
evm.model.Hic_chr_12.772
evm.model.Hic_chr_12.785
evm.model.Hic_chr_17.685
evm.model.Hic_chr_19.748
evm.model.Hic_chr_22.313
evm.model.Hic_chr_22.350
evm.model.Hic_chr_22.411
evm.model.Hic_chr_22.483
evm.model.Hic_chr_22.484
evm.model.Hic_chr_22.553
evm.model.Hic_chr_22.554
evm.model.Hic_chr_16.146
evm.model.Hic_chr_16.147
evm.model.Hic_chr_16.148
evm.model.Hic_chr_16.157
evm.model.Hic_chr_16.158
evm.model.Hic_chr_1.966
evm.model.Hic_chr_23.434
evm.model.Hic_chr_10.488
evm.model.Hic_chr_10.578
evm.model.Hic_chr_10.579
evm.model.Hic_chr_10.580
evm.model.Hic_chr_10.581
evm.model.Hic_chr_10.593
evm.model.Hic_chr_10.735
evm.model.Hic_chr_10.769
evm.model.Hic_chr_23.547
evm.model.Hic_chr_23.553
evm.model.Hic_chr_23.720
evm.model.Hic_chr_23.787
evm.model.Hic_chr_13.196
evm.model.Hic_chr_3.333
evm.model.Hic_chr_3.349
evm.model.Hic_chr_3.476
evm.model.Hic_chr_12.816
evm.model.Hic_chr_20.178
evm.model.Hic_chr_20.207
evm.model.Hic_chr_20.413
evm.model.Hic_chr_20.424
evm.model.Hic_chr_20.431
evm.model.Hic_chr_20.468
evm.model.Hic_chr_20.469
evm.model.Hic_chr_20.471
evm.model.Hic_chr_20.472
evm.model.Hic_chr_19.749
evm.model.Hic_chr_19.751
evm.model.Hic_chr_17.742
evm.model.Hic_chr_17.751
evm.model.Hic_chr_17.780
evm.model.Hic_chr_17.798
evm.model.Hic_chr_17.805
evm.model.Hic_chr_17.813
evm.model.Hic_chr_14.288
evm.model.Hic_chr_14.289
evm.model.Hic_chr_14.310
evm.model.Hic_chr_14.341
evm.model.Hic_chr_14.535
evm.model.Hic_chr_16.324
evm.model.Hic_chr_16.369
evm.model.Hic_chr_16.370
evm.model.Hic_chr_4.344
evm.model.Hic_chr_19.831
evm.model.Hic_chr_19.837
evm.model.Hic_chr_19.848
evm.model.Hic_chr_10.822
evm.model.Hic_chr_10.823
evm.model.Hic_chr_14.679
evm.model.Hic_chr_14.680
evm.model.Hic_chr_2.406
evm.model.Hic_chr_2.440
evm.model.Hic_chr_2.565
evm.model.Hic_chr_15.25
evm.model.Hic_chr_15.162
evm.model.Hic_chr_15.163
evm.model.Hic_chr_10.847
evm.model.Hic_chr_10.888
evm.model.Hic_chr_10.889
evm.model.Hic_chr_10.949
evm.model.Hic_chr_6.25
evm.model.Hic_chr_6.27
evm.model.Hic_chr_12.824
evm.model.Hic_chr_6.28
evm.model.Hic_chr_6.29
evm.model.Hic_chr_6.30
evm.model.Hic_chr_6.31
evm.model.Hic_chr_6.33
evm.model.Hic_chr_6.34
evm.model.Hic_chr_6.39
evm.model.Hic_chr_6.42
evm.model.Hic_chr_6.45
evm.model.Hic_chr_6.46
evm.model.Hic_chr_6.49
evm.model.Hic_chr_8.845
evm.model.Hic_chr_11.588
evm.model.Hic_chr_11.592
evm.model.Hic_chr_21.419
evm.model.Hic_chr_21.426
evm.model.Hic_chr_21.430
evm.model.Hic_chr_5.9
evm.model.Hic_chr_5.10
evm.model.Hic_chr_18.99
evm.model.Hic_chr_18.101
evm.model.Hic_chr_18.117
evm.model.Hic_chr_4.430
evm.model.Hic_chr_4.478
evm.model.Hic_chr_4.490
evm.model.Hic_chr_10.968
evm.model.Hic_chr_4.569
evm.model.Hic_chr_4.570
evm.model.Hic_chr_4.571
evm.model.Hic_chr_4.572
evm.model.Hic_chr_4.573
evm.model.Hic_chr_4.574
evm.model.Hic_chr_4.575
evm.model.Hic_chr_4.597
evm.model.Hic_chr_4.598
evm.model.Hic_chr_4.773
evm.model.Hic_chr_4.831
evm.model.Hic_chr_4.832
evm.model.Hic_chr_18.118
evm.model.Hic_chr_18.119
evm.model.Hic_chr_18.178
evm.model.Hic_chr_18.307
evm.model.Hic_chr_18.308
evm.model.Hic_chr_18.312
evm.model.Hic_chr_13.324
evm.model.Hic_chr_13.342
evm.model.Hic_chr_13.374
evm.model.Hic_chr_16.371
evm.model.Hic_chr_16.376
evm.model.Hic_chr_22.579
evm.model.Hic_chr_20.556
evm.model.Hic_chr_10.974
evm.model.Hic_chr_10.975
evm.model.Hic_chr_10.976
evm.model.Hic_chr_10.977
evm.model.Hic_chr_10.978
evm.model.Hic_chr_10.979
evm.model.Hic_chr_10.982
evm.model.Hic_chr_3.572
evm.model.Hic_chr_3.671
evm.model.Hic_chr_3.698
evm.model.Hic_chr_3.699
evm.model.Hic_chr_3.700
evm.model.Hic_chr_3.701
evm.model.Hic_chr_3.702
evm.model.Hic_chr_3.735
evm.model.Hic_chr_3.740
evm.model.Hic_chr_3.749
evm.model.Hic_chr_3.782
evm.model.Hic_chr_20.580
evm.model.Hic_chr_20.646
evm.model.Hic_chr_20.685
evm.model.Hic_chr_1.968
evm.model.Hic_chr_7.224
evm.model.Hic_chr_21.437
evm.model.Hic_chr_21.439
evm.model.Hic_chr_21.442
evm.model.Hic_chr_21.443
evm.model.Hic_chr_6.51
evm.model.Hic_chr_6.52
evm.model.Hic_chr_12.902
evm.model.Hic_chr_12.903
evm.model.Hic_chr_12.910
evm.model.Hic_chr_3.797
evm.model.Hic_chr_3.798
evm.model.Hic_chr_5.70
evm.model.Hic_chr_24.160
evm.model.Hic_chr_24.173
evm.model.Hic_chr_22.621
evm.model.Hic_chr_22.634
evm.model.Hic_chr_22.760
evm.model.Hic_chr_22.843
evm.model.Hic_chr_3.805
evm.model.Hic_chr_3.859
evm.model.Hic_chr_22.930
evm.model.Hic_chr_22.932
evm.model.Hic_chr_22.937
evm.model.Hic_chr_22.940
evm.model.Hic_chr_21.478
evm.model.Hic_chr_21.482
evm.model.Hic_chr_21.491
evm.model.Hic_chr_21.513
evm.model.Hic_chr_2.718
evm.model.Hic_chr_2.741
evm.model.Hic_chr_5.105
evm.model.Hic_chr_5.168
evm.model.Hic_chr_8.859
evm.model.Hic_chr_8.860
evm.model.Hic_chr_8.861
evm.model.Hic_chr_21.530
evm.model.Hic_chr_16.389
evm.model.Hic_chr_16.400
evm.model.Hic_chr_16.417
evm.model.Hic_chr_6.60
evm.model.Hic_chr_6.77
evm.model.Hic_chr_6.92
evm.model.Hic_chr_6.143
evm.model.Hic_chr_6.238
evm.model.Hic_chr_6.239
evm.model.Hic_chr_6.529
evm.model.Hic_chr_6.559
evm.model.Hic_chr_6.631
evm.model.Hic_chr_5.342
evm.model.Hic_chr_16.421
evm.model.Hic_chr_16.424
evm.model.Hic_chr_16.425
evm.model.Hic_chr_6.633
evm.model.Hic_chr_4.948
evm.model.Hic_chr_17.930
evm.model.Hic_chr_17.933
evm.model.Hic_chr_18.345
evm.model.Hic_chr_18.346
evm.model.Hic_chr_15.340
evm.model.Hic_chr_15.409
evm.model.Hic_chr_15.420
evm.model.Hic_chr_15.455
evm.model.Hic_chr_15.542
evm.model.Hic_chr_15.628
evm.model.Hic_chr_15.629
evm.model.Hic_chr_2.766
evm.model.Hic_chr_6.635
evm.model.Hic_chr_6.636
evm.model.Hic_chr_4.973
evm.model.Hic_chr_4.982
evm.model.Hic_chr_4.992
evm.model.Hic_chr_4.994
evm.model.Hic_chr_24.176
evm.model.Hic_chr_3.957
evm.model.Hic_chr_3.991
evm.model.Hic_chr_4.997
evm.model.Hic_chr_4.998
evm.model.Hic_chr_15.689
evm.model.Hic_chr_15.749
evm.model.Hic_chr_15.750
evm.model.Hic_chr_5.406
evm.model.Hic_chr_5.430
evm.model.Hic_chr_5.567
evm.model.Hic_chr_5.716
evm.model.Hic_chr_5.816
evm.model.Hic_chr_5.817
evm.model.Hic_chr_15.759
evm.model.Hic_chr_15.760
evm.model.Hic_chr_15.768
evm.model.Hic_chr_15.769
evm.model.Hic_chr_16.476
evm.model.Hic_chr_16.500
evm.model.Hic_chr_16.502
evm.model.Hic_chr_16.523
evm.model.Hic_chr_16.531
evm.model.Hic_chr_19.910
evm.model.Hic_chr_19.911
evm.model.Hic_chr_19.912
evm.model.Hic_chr_15.775
evm.model.Hic_chr_15.784
evm.model.Hic_chr_10.1000
evm.model.Hic_chr_10.1001
evm.model.Hic_chr_24.435
evm.model.Hic_chr_24.449
evm.model.Hic_chr_24.527
evm.model.Hic_chr_24.559
evm.model.Hic_chr_12.948
evm.model.Hic_chr_12.949
evm.model.Hic_chr_12.951
evm.model.Hic_chr_24.565
evm.model.Hic_chr_24.566
evm.model.Hic_chr_24.567
evm.model.Hic_chr_24.586
evm.model.Hic_chr_21.543
evm.model.Hic_chr_21.597
evm.model.Hic_chr_21.603
evm.model.Hic_chr_23.841
evm.model.Hic_chr_23.842
evm.model.Hic_chr_9.502
evm.model.Hic_chr_19.918
evm.model.Hic_chr_19.935
evm.model.Hic_chr_19.969
evm.model.Hic_chr_19.1000
evm.model.Hic_chr_19.1001
evm.model.Hic_chr_19.1002
evm.model.Hic_chr_19.1003
evm.model.Hic_chr_19.1004
evm.model.Hic_chr_19.1005
evm.model.Hic_chr_19.1006
evm.model.Hic_chr_19.1007
evm.model.Hic_chr_19.1008
evm.model.Hic_chr_19.1009
evm.model.Hic_chr_19.1010
evm.model.Hic_chr_19.1011
evm.model.Hic_chr_19.1012
evm.model.Hic_chr_19.1013
evm.model.Hic_chr_19.1014
evm.model.Hic_chr_19.1015
evm.model.Hic_chr_19.1016
evm.model.Hic_chr_19.1017
evm.model.Hic_chr_19.1018
evm.model.Hic_chr_19.1019
evm.model.Hic_chr_19.1020
evm.model.Hic_chr_19.1021
evm.model.Hic_chr_19.1022
evm.model.Hic_chr_19.1023
evm.model.Hic_chr_19.1024
evm.model.Hic_chr_19.1025
evm.model.Hic_chr_19.1026
evm.model.Hic_chr_19.1027
evm.model.Hic_chr_19.1028
evm.model.Hic_chr_19.1029
evm.model.Hic_chr_19.1030
evm.model.Hic_chr_19.1031
evm.model.Hic_chr_19.1032
evm.model.Hic_chr_19.1033
evm.model.Hic_chr_19.1034
evm.model.Hic_chr_19.1035
evm.model.Hic_chr_19.1036
evm.model.Hic_chr_19.1037
evm.model.Hic_chr_19.1038
evm.model.Hic_chr_19.1039
evm.model.Hic_chr_19.1040
evm.model.Hic_chr_19.1041
evm.model.Hic_chr_19.1042
evm.model.Hic_chr_19.1043
evm.model.Hic_chr_19.1044
evm.model.Hic_chr_19.1045
evm.model.Hic_chr_19.1046
evm.model.Hic_chr_19.1047
evm.model.Hic_chr_19.1048
evm.model.Hic_chr_19.1049
evm.model.Hic_chr_19.1050
evm.model.Hic_chr_19.1051
evm.model.Hic_chr_19.1052
evm.model.Hic_chr_19.1053
evm.model.Hic_chr_19.1054
evm.model.Hic_chr_19.1055
evm.model.Hic_chr_19.1056
evm.model.Hic_chr_19.1057
evm.model.Hic_chr_19.1058
evm.model.Hic_chr_19.1059
evm.model.Hic_chr_19.1060
evm.model.Hic_chr_19.1061
evm.model.Hic_chr_19.1062
evm.model.Hic_chr_19.1063
evm.model.Hic_chr_19.1064
evm.model.Hic_chr_19.1065
evm.model.Hic_chr_19.1066
evm.model.Hic_chr_19.1067
evm.model.Hic_chr_19.1068
evm.model.Hic_chr_19.1069
evm.model.Hic_chr_19.1070
evm.model.Hic_chr_19.1071
evm.model.Hic_chr_19.1072
evm.model.Hic_chr_19.1073
evm.model.Hic_chr_19.1074
evm.model.Hic_chr_19.1075
evm.model.Hic_chr_19.1076
evm.model.Hic_chr_19.1077
evm.model.Hic_chr_19.1078
evm.model.Hic_chr_19.1079
evm.model.Hic_chr_19.1080
evm.model.Hic_chr_19.1081
evm.model.Hic_chr_19.1082
evm.model.Hic_chr_19.1083
evm.model.Hic_chr_19.1084
evm.model.Hic_chr_19.1085
evm.model.Hic_chr_19.1086
evm.model.Hic_chr_19.1087
evm.model.Hic_chr_19.1088
evm.model.Hic_chr_19.1089
evm.model.Hic_chr_19.1090
evm.model.Hic_chr_19.1091
evm.model.Hic_chr_19.1092
evm.model.Hic_chr_19.1093
evm.model.Hic_chr_19.1094
evm.model.Hic_chr_19.1095
evm.model.Hic_chr_19.1096
evm.model.Hic_chr_19.1097
evm.model.Hic_chr_19.1098
evm.model.Hic_chr_19.1099
evm.model.Hic_chr_19.1100
evm.model.Hic_chr_19.1101
evm.model.Hic_chr_19.1102
evm.model.Hic_chr_19.1103
evm.model.Hic_chr_19.1104
evm.model.Hic_chr_19.1105
evm.model.Hic_chr_19.1106
evm.model.Hic_chr_19.1107
evm.model.Hic_chr_19.1108
evm.model.Hic_chr_19.1109
evm.model.Hic_chr_19.1110
evm.model.Hic_chr_19.1111
evm.model.Hic_chr_19.1112
evm.model.Hic_chr_19.1113
evm.model.Hic_chr_19.1114
evm.model.Hic_chr_19.1115
evm.model.Hic_chr_19.1116
evm.model.Hic_chr_19.1117
evm.model.Hic_chr_19.1118
evm.model.Hic_chr_19.1119
evm.model.Hic_chr_19.1120
evm.model.Hic_chr_19.1121
evm.model.Hic_chr_19.1122
evm.model.Hic_chr_19.1123
evm.model.Hic_chr_19.1124
evm.model.Hic_chr_19.1125
evm.model.Hic_chr_19.1126
evm.model.Hic_chr_19.1127
evm.model.Hic_chr_19.1128
evm.model.Hic_chr_19.1129
evm.model.Hic_chr_19.1130
evm.model.Hic_chr_19.1131
evm.model.Hic_chr_19.1132
evm.model.Hic_chr_19.1133
evm.model.Hic_chr_19.1134
evm.model.Hic_chr_19.1135
evm.model.Hic_chr_19.1136
evm.model.Hic_chr_19.1137
evm.model.Hic_chr_19.1138
evm.model.Hic_chr_19.1139
evm.model.Hic_chr_19.1140
evm.model.Hic_chr_19.1141
evm.model.Hic_chr_19.1142
evm.model.Hic_chr_19.1143
evm.model.Hic_chr_19.1144
evm.model.Hic_chr_19.1145
evm.model.Hic_chr_19.1146
evm.model.Hic_chr_19.1147
evm.model.Hic_chr_19.1148
evm.model.Hic_chr_19.1149
evm.model.Hic_chr_19.1150
evm.model.Hic_chr_19.1151
evm.model.Hic_chr_19.1152
evm.model.Hic_chr_19.1153
evm.model.Hic_chr_19.1154
evm.model.Hic_chr_19.1155
evm.model.Hic_chr_19.1156
evm.model.Hic_chr_19.1157
evm.model.Hic_chr_19.1158
evm.model.Hic_chr_19.1159
evm.model.Hic_chr_19.1160
evm.model.Hic_chr_19.1161
evm.model.Hic_chr_19.1162
evm.model.Hic_chr_19.1163
evm.model.Hic_chr_19.1164
evm.model.Hic_chr_19.1165
evm.model.Hic_chr_19.1166
evm.model.Hic_chr_19.1167
evm.model.Hic_chr_19.1168
evm.model.Hic_chr_19.1169
evm.model.Hic_chr_19.1170
evm.model.Hic_chr_19.1171
evm.model.Hic_chr_19.1172
evm.model.Hic_chr_19.1173
evm.model.Hic_chr_19.1174
evm.model.Hic_chr_19.1175
evm.model.Hic_chr_19.1176
evm.model.Hic_chr_19.1177
evm.model.Hic_chr_19.1178
evm.model.Hic_chr_19.1179
evm.model.Hic_chr_19.1180
evm.model.Hic_chr_19.1181
evm.model.Hic_chr_19.1182
evm.model.Hic_chr_19.1183
evm.model.Hic_chr_19.1184
evm.model.Hic_chr_19.1185
evm.model.Hic_chr_19.1186
evm.model.Hic_chr_19.1187
evm.model.Hic_chr_19.1188
evm.model.Hic_chr_19.1189
evm.model.Hic_chr_19.1190
evm.model.Hic_chr_19.1191
evm.model.Hic_chr_19.1192
evm.model.Hic_chr_19.1193
evm.model.Hic_chr_19.1194
evm.model.Hic_chr_19.1195
evm.model.Hic_chr_19.1196
evm.model.Hic_chr_19.1197
evm.model.Hic_chr_19.1198
evm.model.Hic_chr_19.1199
evm.model.Hic_chr_19.1200
evm.model.Hic_chr_19.1201
evm.model.Hic_chr_19.1202
evm.model.Hic_chr_19.1203
evm.model.Hic_chr_19.1204
evm.model.Hic_chr_19.1205
evm.model.Hic_chr_19.1206
evm.model.Hic_chr_19.1207
evm.model.Hic_chr_19.1208
evm.model.Hic_chr_19.1209
evm.model.Hic_chr_19.1210
evm.model.Hic_chr_19.1211
evm.model.Hic_chr_19.1212
evm.model.Hic_chr_19.1213
evm.model.Hic_chr_19.1214
evm.model.Hic_chr_19.1215
evm.model.Hic_chr_19.1216
evm.model.Hic_chr_19.1217
evm.model.Hic_chr_19.1218
evm.model.Hic_chr_19.1219
evm.model.Hic_chr_19.1220
evm.model.Hic_chr_19.1221
evm.model.Hic_chr_19.1222
evm.model.Hic_chr_19.1223
evm.model.Hic_chr_19.1224
evm.model.Hic_chr_19.1225
evm.model.Hic_chr_19.1226
evm.model.Hic_chr_19.1227
evm.model.Hic_chr_19.1228
evm.model.Hic_chr_19.1229
evm.model.Hic_chr_19.1230
evm.model.Hic_chr_19.1231
evm.model.Hic_chr_19.1232
evm.model.Hic_chr_19.1233
evm.model.Hic_chr_19.1234
evm.model.Hic_chr_19.1235
evm.model.Hic_chr_19.1236
evm.model.Hic_chr_19.1237
evm.model.Hic_chr_19.1238
evm.model.Hic_chr_19.1239
evm.model.Hic_chr_19.1240
evm.model.Hic_chr_19.1241
evm.model.Hic_chr_19.1242
evm.model.Hic_chr_19.1243
evm.model.Hic_chr_19.1244
evm.model.Hic_chr_19.1245
evm.model.Hic_chr_19.1246
evm.model.Hic_chr_19.1247
evm.model.Hic_chr_19.1248
evm.model.Hic_chr_19.1249
evm.model.Hic_chr_19.1250
evm.model.Hic_chr_19.1251
evm.model.Hic_chr_19.1252
evm.model.Hic_chr_19.1253
evm.model.Hic_chr_19.1254
evm.model.Hic_chr_19.1255
evm.model.Hic_chr_19.1256
evm.model.Hic_chr_19.1257
evm.model.Hic_chr_19.1258
evm.model.Hic_chr_19.1259
evm.model.Hic_chr_19.1260
evm.model.Hic_chr_19.1261
evm.model.Hic_chr_19.1262
evm.model.Hic_chr_19.1263
evm.model.Hic_chr_19.1264
evm.model.Hic_chr_19.1265
evm.model.Hic_chr_19.1266
evm.model.Hic_chr_19.1267
evm.model.Hic_chr_19.1268
evm.model.Hic_chr_19.1269
evm.model.Hic_chr_19.1270
evm.model.Hic_chr_19.1271
evm.model.Hic_chr_19.1272
evm.model.Hic_chr_19.1273
evm.model.Hic_chr_19.1274
evm.model.Hic_chr_19.1275
evm.model.Hic_chr_19.1276
evm.model.Hic_chr_19.1277
evm.model.Hic_chr_19.1278
evm.model.Hic_chr_19.1279
evm.model.Hic_chr_19.1280
evm.model.Hic_chr_19.1281
evm.model.Hic_chr_19.1282
evm.model.Hic_chr_19.1283
evm.model.Hic_chr_19.1284
evm.model.Hic_chr_19.1285
evm.model.Hic_chr_19.1286
evm.model.Hic_chr_19.1287
evm.model.Hic_chr_19.1288
evm.model.Hic_chr_1.1028
evm.model.Hic_chr_1.1029
evm.model.Hic_chr_1.1030
evm.model.Hic_chr_10.1002
evm.model.Hic_chr_10.1003
evm.model.Hic_chr_10.1004
evm.model.Hic_chr_10.1005
evm.model.Hic_chr_10.1006
evm.model.Hic_chr_10.1007
evm.model.Hic_chr_10.1008
evm.model.Hic_chr_10.1009
evm.model.Hic_chr_10.1010
evm.model.Hic_chr_10.1011
evm.model.Hic_chr_10.1012
evm.model.Hic_chr_10.1013
evm.model.Hic_chr_10.1014
evm.model.Hic_chr_10.1015
evm.model.Hic_chr_10.1016
evm.model.Hic_chr_10.1017
evm.model.Hic_chr_10.1018
evm.model.Hic_chr_10.1019
evm.model.Hic_chr_10.1020
evm.model.Hic_chr_10.1021
evm.model.Hic_chr_10.1022
evm.model.Hic_chr_10.1023
evm.model.Hic_chr_10.1024
evm.model.Hic_chr_10.1025
evm.model.Hic_chr_10.1026
evm.model.Hic_chr_10.1027
evm.model.Hic_chr_10.1028
evm.model.Hic_chr_10.1029
evm.model.Hic_chr_10.1030
evm.model.Hic_chr_10.1031
evm.model.Hic_chr_10.1032
evm.model.Hic_chr_10.1033
evm.model.Hic_chr_10.1034
evm.model.Hic_chr_10.1035
evm.model.Hic_chr_10.1036
evm.model.Hic_chr_10.1037
evm.model.Hic_chr_10.1038
evm.model.Hic_chr_10.1039
evm.model.Hic_chr_10.1040
evm.model.Hic_chr_10.1041
evm.model.Hic_chr_10.1042
evm.model.Hic_chr_10.1043
evm.model.Hic_chr_10.1044
evm.model.Hic_chr_12.952
evm.model.Hic_chr_20.726
evm.model.Hic_chr_7.439
evm.model.Hic_chr_7.521
evm.model.Hic_chr_8.881
evm.model.Hic_chr_23.863
evm.model.Hic_chr_23.865
evm.model.Hic_chr_24.635
evm.model.Hic_chr_24.636
evm.model.Hic_chr_24.637
evm.model.Hic_chr_24.639
evm.model.Hic_chr_24.640
evm.model.Hic_chr_24.641
evm.model.Hic_chr_19.1289
evm.model.Hic_chr_19.1290
evm.model.Hic_chr_19.1291
evm.model.Hic_chr_19.1292
evm.model.Hic_chr_19.1293
evm.model.Hic_chr_19.1294
evm.model.Hic_chr_19.1295
evm.model.Hic_chr_19.1296
evm.model.Hic_chr_19.1297
evm.model.Hic_chr_19.1298
evm.model.Hic_chr_19.1299
evm.model.Hic_chr_19.1300
evm.model.Hic_chr_19.1301
evm.model.Hic_chr_19.1302
evm.model.Hic_chr_19.1303
evm.model.Hic_chr_19.1304
evm.model.Hic_chr_19.1305
evm.model.Hic_chr_19.1306
evm.model.Hic_chr_19.1307
evm.model.Hic_chr_19.1308
evm.model.Hic_chr_19.1309
evm.model.Hic_chr_19.1310
evm.model.Hic_chr_19.1311
evm.model.Hic_chr_19.1312
evm.model.Hic_chr_19.1313
evm.model.Hic_chr_19.1314
evm.model.Hic_chr_19.1315
evm.model.Hic_chr_19.1316
evm.model.Hic_chr_11.673
evm.model.Hic_chr_11.674
evm.model.Hic_chr_11.675
evm.model.Hic_chr_20.730
evm.model.Hic_chr_20.797
evm.model.Hic_chr_20.845
evm.model.Hic_chr_7.728
evm.model.Hic_chr_8.886
evm.model.Hic_chr_8.887
evm.model.Hic_chr_8.888
evm.model.Hic_chr_8.889
evm.model.Hic_chr_8.895
evm.model.Hic_chr_8.926
evm.model.Hic_chr_8.927
evm.model.Hic_chr_19.1317
evm.model.Hic_chr_19.1318
evm.model.Hic_chr_19.1319
evm.model.Hic_chr_19.1320
evm.model.Hic_chr_19.1321
evm.model.Hic_chr_2.937
evm.model.Hic_chr_24.643
evm.model.Hic_chr_24.644
evm.model.Hic_chr_6.641
evm.model.Hic_chr_6.642
evm.model.Hic_chr_15.847
evm.model.Hic_chr_10.1045
evm.model.Hic_chr_10.1046
evm.model.Hic_chr_10.1047
evm.model.Hic_chr_10.1048
evm.model.Hic_chr_10.1049
evm.model.Hic_chr_10.1050
evm.model.Hic_chr_10.1051
evm.model.Hic_chr_10.1052
evm.model.Hic_chr_10.1053
evm.model.Hic_chr_10.1054
evm.model.Hic_chr_10.1055
evm.model.Hic_chr_10.1056
evm.model.Hic_chr_10.1057
evm.model.Hic_chr_10.1058
evm.model.Hic_chr_10.1059
evm.model.Hic_chr_10.1060
evm.model.Hic_chr_10.1061
evm.model.Hic_chr_10.1062
evm.model.Hic_chr_10.1063
evm.model.Hic_chr_10.1064
evm.model.Hic_chr_10.1065
evm.model.Hic_chr_10.1066
evm.model.Hic_chr_10.1067
evm.model.Hic_chr_10.1068
evm.model.Hic_chr_10.1069
evm.model.Hic_chr_10.1070
evm.model.Hic_chr_10.1071
evm.model.Hic_chr_10.1072
evm.model.Hic_chr_10.1073
evm.model.Hic_chr_10.1074
evm.model.Hic_chr_10.1075
evm.model.Hic_chr_10.1076
evm.model.Hic_chr_10.1077
evm.model.Hic_chr_10.1078
evm.model.Hic_chr_10.1079
evm.model.Hic_chr_10.1080
evm.model.Hic_chr_10.1081
evm.model.Hic_chr_10.1082
evm.model.Hic_chr_10.1083
evm.model.Hic_chr_10.1084
evm.model.Hic_chr_10.1085
evm.model.Hic_chr_10.1086
evm.model.Hic_chr_10.1087
evm.model.Hic_chr_22.953
evm.model.Hic_chr_16.599
evm.model.Hic_chr_24.684
evm.model.Hic_chr_24.720
evm.model.Hic_chr_24.961
evm.model.Hic_chr_24.995
evm.model.Hic_chr_24.1000
evm.model.Hic_chr_24.1001
evm.model.Hic_chr_24.1002
evm.model.Hic_chr_24.1003
evm.model.Hic_chr_24.1004
evm.model.Hic_chr_24.1005
evm.model.Hic_chr_24.1006
evm.model.Hic_chr_24.1007
evm.model.Hic_chr_24.1008
evm.model.Hic_chr_24.1009
evm.model.Hic_chr_24.1010
evm.model.Hic_chr_24.1011
evm.model.Hic_chr_24.1012
evm.model.Hic_chr_24.1013
evm.model.Hic_chr_24.1014
evm.model.Hic_chr_24.1015
evm.model.Hic_chr_24.1016
evm.model.Hic_chr_24.1017
evm.model.Hic_chr_24.1018
evm.model.Hic_chr_24.1019
evm.model.Hic_chr_24.1020
evm.model.Hic_chr_24.1021
evm.model.Hic_chr_24.1022
evm.model.Hic_chr_24.1023
evm.model.Hic_chr_24.1024
evm.model.Hic_chr_24.1025
evm.model.Hic_chr_24.1026
evm.model.Hic_chr_24.1027
evm.model.Hic_chr_24.1028
evm.model.Hic_chr_24.1029
evm.model.Hic_chr_24.1030
evm.model.Hic_chr_24.1031
evm.model.Hic_chr_24.1032
evm.model.Hic_chr_24.1033
evm.model.Hic_chr_24.1034
evm.model.Hic_chr_24.1035
evm.model.Hic_chr_24.1036
evm.model.Hic_chr_24.1037
evm.model.Hic_chr_24.1038
evm.model.Hic_chr_24.1039
evm.model.Hic_chr_24.1040
evm.model.Hic_chr_24.1041
evm.model.Hic_chr_24.1042
evm.model.Hic_chr_24.1043
evm.model.Hic_chr_24.1044
evm.model.Hic_chr_24.1045
evm.model.Hic_chr_24.1046
evm.model.Hic_chr_24.1047
evm.model.Hic_chr_24.1048
evm.model.Hic_chr_24.1049
evm.model.Hic_chr_24.1050
evm.model.Hic_chr_24.1051
evm.model.Hic_chr_24.1052
evm.model.Hic_chr_24.1053
evm.model.Hic_chr_24.1054
evm.model.Hic_chr_24.1055
evm.model.Hic_chr_24.1056
evm.model.Hic_chr_24.1057
evm.model.Hic_chr_24.1058
evm.model.Hic_chr_24.1059
evm.model.Hic_chr_24.1060
evm.model.Hic_chr_24.1061
evm.model.Hic_chr_24.1062
evm.model.Hic_chr_24.1063
evm.model.Hic_chr_24.1064
evm.model.Hic_chr_24.1065
evm.model.Hic_chr_24.1066
evm.model.Hic_chr_24.1067
evm.model.Hic_chr_24.1068
evm.model.Hic_chr_24.1069
evm.model.Hic_chr_24.1070
evm.model.Hic_chr_24.1071
evm.model.Hic_chr_24.1072
evm.model.Hic_chr_24.1073
evm.model.Hic_chr_18.434
evm.model.Hic_chr_18.439
evm.model.Hic_chr_16.655
evm.model.Hic_chr_16.657
evm.model.Hic_chr_16.668
evm.model.Hic_chr_16.691
evm.model.Hic_chr_16.698
evm.model.Hic_chr_16.699
evm.model.Hic_chr_16.736
evm.model.Hic_chr_16.755
evm.model.Hic_chr_16.858
evm.model.Hic_chr_16.908
evm.model.Hic_chr_16.1000
evm.model.Hic_chr_16.1001
evm.model.Hic_chr_16.1002
evm.model.Hic_chr_16.1003
evm.model.Hic_chr_16.1004
evm.model.Hic_chr_16.1005
evm.model.Hic_chr_16.1006
evm.model.Hic_chr_16.1007
evm.model.Hic_chr_16.1008
evm.model.Hic_chr_16.1009
evm.model.Hic_chr_16.1010
evm.model.Hic_chr_16.1011
evm.model.Hic_chr_16.1012
evm.model.Hic_chr_16.1013
evm.model.Hic_chr_16.1014
evm.model.Hic_chr_16.1015
evm.model.Hic_chr_16.1016
evm.model.Hic_chr_16.1017
evm.model.Hic_chr_16.1018
evm.model.Hic_chr_16.1019
evm.model.Hic_chr_16.1020
evm.model.Hic_chr_16.1021
evm.model.Hic_chr_16.1022
evm.model.Hic_chr_16.1023
evm.model.Hic_chr_16.1024
evm.model.Hic_chr_16.1025
evm.model.Hic_chr_16.1026
evm.model.Hic_chr_16.1027
evm.model.Hic_chr_16.1028
evm.model.Hic_chr_16.1029
evm.model.Hic_chr_16.1030
evm.model.Hic_chr_16.1031
evm.model.Hic_chr_16.1032
evm.model.Hic_chr_16.1033
evm.model.Hic_chr_16.1034
evm.model.Hic_chr_16.1035
evm.model.Hic_chr_16.1036
evm.model.Hic_chr_16.1037
evm.model.Hic_chr_16.1038
evm.model.Hic_chr_16.1039
evm.model.Hic_chr_16.1040
evm.model.Hic_chr_16.1041
evm.model.Hic_chr_16.1042
evm.model.Hic_chr_16.1043
evm.model.Hic_chr_16.1044
evm.model.Hic_chr_16.1045
evm.model.Hic_chr_16.1046
evm.model.Hic_chr_16.1047
evm.model.Hic_chr_16.1048
evm.model.Hic_chr_16.1049
evm.model.Hic_chr_16.1050
evm.model.Hic_chr_16.1051
evm.model.Hic_chr_16.1052
evm.model.Hic_chr_16.1053
evm.model.Hic_chr_16.1054
evm.model.Hic_chr_16.1055
evm.model.Hic_chr_16.1056
evm.model.Hic_chr_16.1057
evm.model.Hic_chr_16.1058
evm.model.Hic_chr_16.1059
evm.model.Hic_chr_16.1060
evm.model.Hic_chr_16.1061
evm.model.Hic_chr_16.1062
evm.model.Hic_chr_16.1063
evm.model.Hic_chr_16.1064
evm.model.Hic_chr_16.1065
evm.model.Hic_chr_16.1066
evm.model.Hic_chr_16.1067
evm.model.Hic_chr_16.1068
evm.model.Hic_chr_16.1069
evm.model.Hic_chr_16.1070
evm.model.Hic_chr_16.1071
evm.model.Hic_chr_16.1072
evm.model.Hic_chr_16.1073
evm.model.Hic_chr_16.1074
evm.model.Hic_chr_16.1075
evm.model.Hic_chr_16.1076
evm.model.Hic_chr_16.1077
evm.model.Hic_chr_16.1078
evm.model.Hic_chr_16.1079
evm.model.Hic_chr_16.1080
evm.model.Hic_chr_16.1081
evm.model.Hic_chr_16.1082
evm.model.Hic_chr_16.1083
evm.model.Hic_chr_16.1084
evm.model.Hic_chr_16.1085
evm.model.Hic_chr_16.1086
evm.model.Hic_chr_16.1087
evm.model.Hic_chr_16.1088
evm.model.Hic_chr_16.1089
evm.model.Hic_chr_16.1090
evm.model.Hic_chr_16.1091
evm.model.Hic_chr_16.1092
evm.model.Hic_chr_16.1093
evm.model.Hic_chr_16.1094
evm.model.Hic_chr_16.1095
evm.model.Hic_chr_16.1096
evm.model.Hic_chr_16.1097
evm.model.Hic_chr_16.1098
evm.model.Hic_chr_16.1099
evm.model.Hic_chr_16.1100
evm.model.Hic_chr_16.1101
evm.model.Hic_chr_16.1102
evm.model.Hic_chr_16.1103
evm.model.Hic_chr_16.1104
evm.model.Hic_chr_16.1105
evm.model.Hic_chr_16.1106
evm.model.Hic_chr_16.1107
evm.model.Hic_chr_16.1108
evm.model.Hic_chr_16.1109
evm.model.Hic_chr_16.1110
evm.model.Hic_chr_16.1111
evm.model.Hic_chr_16.1112
evm.model.Hic_chr_16.1113
evm.model.Hic_chr_16.1114
evm.model.Hic_chr_16.1115
evm.model.Hic_chr_16.1116
evm.model.Hic_chr_16.1117
evm.model.Hic_chr_16.1118
evm.model.Hic_chr_16.1119
evm.model.Hic_chr_16.1120
evm.model.Hic_chr_16.1121
evm.model.Hic_chr_16.1122
evm.model.Hic_chr_16.1123
evm.model.Hic_chr_16.1124
evm.model.Hic_chr_16.1125
evm.model.Hic_chr_16.1126
evm.model.Hic_chr_16.1127
evm.model.Hic_chr_16.1128
evm.model.Hic_chr_16.1129
evm.model.Hic_chr_16.1130
evm.model.Hic_chr_16.1131
evm.model.Hic_chr_16.1132
evm.model.Hic_chr_16.1133
evm.model.Hic_chr_16.1134
evm.model.Hic_chr_16.1135
evm.model.Hic_chr_16.1136
evm.model.Hic_chr_16.1137
evm.model.Hic_chr_16.1138
evm.model.Hic_chr_16.1139
evm.model.Hic_chr_16.1140
evm.model.Hic_chr_16.1141
evm.model.Hic_chr_16.1142
evm.model.Hic_chr_16.1143
evm.model.Hic_chr_16.1144
evm.model.Hic_chr_16.1145
evm.model.Hic_chr_16.1146
evm.model.Hic_chr_16.1147
evm.model.Hic_chr_16.1148
evm.model.Hic_chr_16.1149
evm.model.Hic_chr_16.1150
evm.model.Hic_chr_16.1151
evm.model.Hic_chr_16.1152
evm.model.Hic_chr_16.1153
evm.model.Hic_chr_16.1154
evm.model.Hic_chr_16.1155
evm.model.Hic_chr_16.1156
evm.model.Hic_chr_16.1157
evm.model.Hic_chr_16.1158
evm.model.Hic_chr_9.522
evm.model.Hic_chr_9.527
evm.model.Hic_chr_9.574
evm.model.Hic_chr_9.597
evm.model.Hic_chr_15.889
evm.model.Hic_chr_15.956
evm.model.Hic_chr_15.961
evm.model.Hic_chr_15.962
evm.model.Hic_chr_15.973
evm.model.Hic_chr_18.481
evm.model.Hic_chr_18.485
evm.model.Hic_chr_18.500
evm.model.Hic_chr_18.501
evm.model.Hic_chr_18.526
evm.model.Hic_chr_18.578
evm.model.Hic_chr_18.600
evm.model.Hic_chr_18.601
evm.model.Hic_chr_18.602
evm.model.Hic_chr_18.603
evm.model.Hic_chr_8.971
evm.model.Hic_chr_8.972
evm.model.Hic_chr_3.1031
evm.model.Hic_chr_3.1032
evm.model.Hic_chr_13.407
evm.model.Hic_chr_19.1322
evm.model.Hic_chr_19.1323
evm.model.Hic_chr_19.1324
evm.model.Hic_chr_19.1325
evm.model.Hic_chr_19.1326
evm.model.Hic_chr_19.1327
evm.model.Hic_chr_19.1328
evm.model.Hic_chr_19.1329
evm.model.Hic_chr_19.1330
evm.model.Hic_chr_19.1331
evm.model.Hic_chr_19.1332
evm.model.Hic_chr_19.1333
evm.model.Hic_chr_19.1334
evm.model.Hic_chr_19.1335
evm.model.Hic_chr_19.1336
evm.model.Hic_chr_19.1337
evm.model.Hic_chr_19.1338
evm.model.Hic_chr_19.1339
evm.model.Hic_chr_19.1340
evm.model.Hic_chr_19.1341
evm.model.Hic_chr_19.1342
evm.model.Hic_chr_19.1343
evm.model.Hic_chr_19.1344
evm.model.Hic_chr_19.1345
evm.model.Hic_chr_19.1346
evm.model.Hic_chr_19.1347
evm.model.Hic_chr_19.1348
evm.model.Hic_chr_19.1349
evm.model.Hic_chr_19.1350
evm.model.Hic_chr_19.1351
evm.model.Hic_chr_19.1352
evm.model.Hic_chr_19.1353
evm.model.Hic_chr_19.1354
evm.model.Hic_chr_19.1355
evm.model.Hic_chr_19.1356
evm.model.Hic_chr_19.1357
evm.model.Hic_chr_19.1358
evm.model.Hic_chr_19.1359
evm.model.Hic_chr_19.1360
evm.model.Hic_chr_19.1361
evm.model.Hic_chr_19.1362
evm.model.Hic_chr_19.1363
evm.model.Hic_chr_19.1364
evm.model.Hic_chr_19.1365
evm.model.Hic_chr_19.1366
evm.model.Hic_chr_19.1367
evm.model.Hic_chr_19.1368
evm.model.Hic_chr_19.1369
evm.model.Hic_chr_19.1370
evm.model.Hic_chr_19.1371
evm.model.Hic_chr_19.1372
evm.model.Hic_chr_19.1373
evm.model.Hic_chr_19.1374
evm.model.Hic_chr_19.1375
evm.model.Hic_chr_19.1376
evm.model.Hic_chr_13.434
evm.model.Hic_chr_13.458
evm.model.Hic_chr_13.459
evm.model.Hic_chr_13.713
evm.model.Hic_chr_18.641
evm.model.Hic_chr_5.883
evm.model.Hic_chr_5.884
evm.model.Hic_chr_1.197
evm.model.Hic_chr_10.19
evm.model.Hic_chr_9.22
evm.model.Hic_chr_9.89
evm.model.Hic_chr_9.239
evm.model.Hic_chr_10.63
evm.model.Hic_chr_10.64
evm.model.Hic_chr_10.65
evm.model.Hic_chr_10.99
evm.model.Hic_chr_10.137
evm.model.Hic_chr_16.3
evm.model.Hic_chr_16.4
evm.model.Hic_chr_13.83
evm.model.Hic_chr_13.93
evm.model.Hic_chr_20.30
evm.model.Hic_chr_20.32
evm.model.Hic_chr_1.277
evm.model.Hic_chr_1.481
evm.model.Hic_chr_4.169
evm.model.Hic_chr_4.189
evm.model.Hic_chr_15.6
evm.model.Hic_chr_12.2
evm.model.Hic_chr_19.252
evm.model.Hic_chr_19.303
evm.model.Hic_chr_19.375
evm.model.Hic_chr_8.24
evm.model.Hic_chr_1.768
evm.model.Hic_chr_23.221
evm.model.Hic_chr_23.240
evm.model.Hic_chr_23.244
evm.model.Hic_chr_24.100
evm.model.Hic_chr_7.72
evm.model.Hic_chr_7.88
evm.model.Hic_chr_7.101
evm.model.Hic_chr_8.148
evm.model.Hic_chr_22.60
evm.model.Hic_chr_22.86
evm.model.Hic_chr_14.13
evm.model.Hic_chr_14.84
evm.model.Hic_chr_14.85
evm.model.Hic_chr_14.106
evm.model.Hic_chr_14.124
evm.model.Hic_chr_11.2
evm.model.Hic_chr_11.294
evm.model.Hic_chr_23.259
evm.model.Hic_chr_4.285
evm.model.Hic_chr_11.402
evm.model.Hic_chr_12.443
evm.model.Hic_chr_12.574
evm.model.Hic_chr_12.610
evm.model.Hic_chr_12.653
evm.model.Hic_chr_12.669
evm.model.Hic_chr_23.398
evm.model.Hic_chr_8.188
evm.model.Hic_chr_8.195
evm.model.Hic_chr_8.297
evm.model.Hic_chr_8.550
evm.model.Hic_chr_19.642
evm.model.Hic_chr_19.695
evm.model.Hic_chr_19.737
evm.model.Hic_chr_13.121
evm.model.Hic_chr_13.151
evm.model.Hic_chr_13.161
evm.model.Hic_chr_2.23
evm.model.Hic_chr_17.215
evm.model.Hic_chr_17.406
evm.model.Hic_chr_17.407
evm.model.Hic_chr_10.285
evm.model.Hic_chr_21.315
evm.model.Hic_chr_11.575
evm.model.Hic_chr_17.469
evm.model.Hic_chr_17.586
evm.model.Hic_chr_17.610
evm.model.Hic_chr_17.613
evm.model.Hic_chr_17.615
evm.model.Hic_chr_17.616
evm.model.Hic_chr_22.253
evm.model.Hic_chr_22.264
evm.model.Hic_chr_22.276
evm.model.Hic_chr_7.173
evm.model.Hic_chr_7.176
evm.model.Hic_chr_12.721
evm.model.Hic_chr_3.217
evm.model.Hic_chr_22.312
evm.model.Hic_chr_22.485
evm.model.Hic_chr_22.517
evm.model.Hic_chr_16.121
evm.model.Hic_chr_16.128
evm.model.Hic_chr_23.411
evm.model.Hic_chr_23.412
evm.model.Hic_chr_10.485
evm.model.Hic_chr_10.486
evm.model.Hic_chr_10.487
evm.model.Hic_chr_10.718
evm.model.Hic_chr_10.782
evm.model.Hic_chr_10.820
evm.model.Hic_chr_23.771
evm.model.Hic_chr_13.203
evm.model.Hic_chr_13.229
evm.model.Hic_chr_3.387
evm.model.Hic_chr_3.442
evm.model.Hic_chr_3.560
evm.model.Hic_chr_3.561
evm.model.Hic_chr_12.798
evm.model.Hic_chr_12.821
evm.model.Hic_chr_17.763
evm.model.Hic_chr_17.764
evm.model.Hic_chr_14.340
evm.model.Hic_chr_14.342
evm.model.Hic_chr_14.366
evm.model.Hic_chr_14.418
evm.model.Hic_chr_14.419
evm.model.Hic_chr_14.420
evm.model.Hic_chr_14.561
evm.model.Hic_chr_16.203
evm.model.Hic_chr_16.266
evm.model.Hic_chr_16.310
evm.model.Hic_chr_4.355
evm.model.Hic_chr_14.661
evm.model.Hic_chr_2.292
evm.model.Hic_chr_15.251
evm.model.Hic_chr_13.270
evm.model.Hic_chr_13.277
evm.model.Hic_chr_4.398
evm.model.Hic_chr_4.409
evm.model.Hic_chr_4.410
evm.model.Hic_chr_4.418
evm.model.Hic_chr_4.830
evm.model.Hic_chr_18.213
evm.model.Hic_chr_13.327
evm.model.Hic_chr_13.351
evm.model.Hic_chr_20.534
evm.model.Hic_chr_10.995
evm.model.Hic_chr_20.570
evm.model.Hic_chr_12.905
evm.model.Hic_chr_22.623
evm.model.Hic_chr_22.928
evm.model.Hic_chr_22.936
evm.model.Hic_chr_22.944
evm.model.Hic_chr_2.582
evm.model.Hic_chr_2.724
evm.model.Hic_chr_2.753
evm.model.Hic_chr_2.754
evm.model.Hic_chr_5.100
evm.model.Hic_chr_5.195
evm.model.Hic_chr_1.987
evm.model.Hic_chr_6.163
evm.model.Hic_chr_6.183
evm.model.Hic_chr_6.186
evm.model.Hic_chr_6.467
evm.model.Hic_chr_6.523
evm.model.Hic_chr_6.572
evm.model.Hic_chr_5.350
evm.model.Hic_chr_17.817
evm.model.Hic_chr_17.915
evm.model.Hic_chr_18.363
evm.model.Hic_chr_18.370
evm.model.Hic_chr_18.391
evm.model.Hic_chr_15.272
evm.model.Hic_chr_15.333
evm.model.Hic_chr_15.493
evm.model.Hic_chr_10.999
evm.model.Hic_chr_3.998
evm.model.Hic_chr_5.371
evm.model.Hic_chr_5.466
evm.model.Hic_chr_5.818
evm.model.Hic_chr_16.481
evm.model.Hic_chr_16.505
evm.model.Hic_chr_16.513
evm.model.Hic_chr_16.522
evm.model.Hic_chr_16.530
evm.model.Hic_chr_24.379
evm.model.Hic_chr_16.555
evm.model.Hic_chr_2.790
evm.model.Hic_chr_24.584
evm.model.Hic_chr_21.547
evm.model.Hic_chr_21.561
evm.model.Hic_chr_9.501
evm.model.Hic_chr_19.936
evm.model.Hic_chr_17.975
evm.model.Hic_chr_12.953
evm.model.Hic_chr_12.961
evm.model.Hic_chr_7.245
evm.model.Hic_chr_7.252
evm.model.Hic_chr_7.271
evm.model.Hic_chr_7.524
evm.model.Hic_chr_18.406
evm.model.Hic_chr_24.609
evm.model.Hic_chr_20.860
evm.model.Hic_chr_22.952
evm.model.Hic_chr_24.780
evm.model.Hic_chr_24.942
evm.model.Hic_chr_24.973
evm.model.Hic_chr_16.720
evm.model.Hic_chr_16.721
evm.model.Hic_chr_16.797
evm.model.Hic_chr_9.569
evm.model.Hic_chr_9.592
evm.model.Hic_chr_15.974
evm.model.Hic_chr_13.549
