# Supplementary figures and images for: Pattern of New Gene Origination in a Special Fish Lineage, the Flatfishes
Source: MDPI journal article supplement (doi:10.3390/genes12111819), 2021-11-19

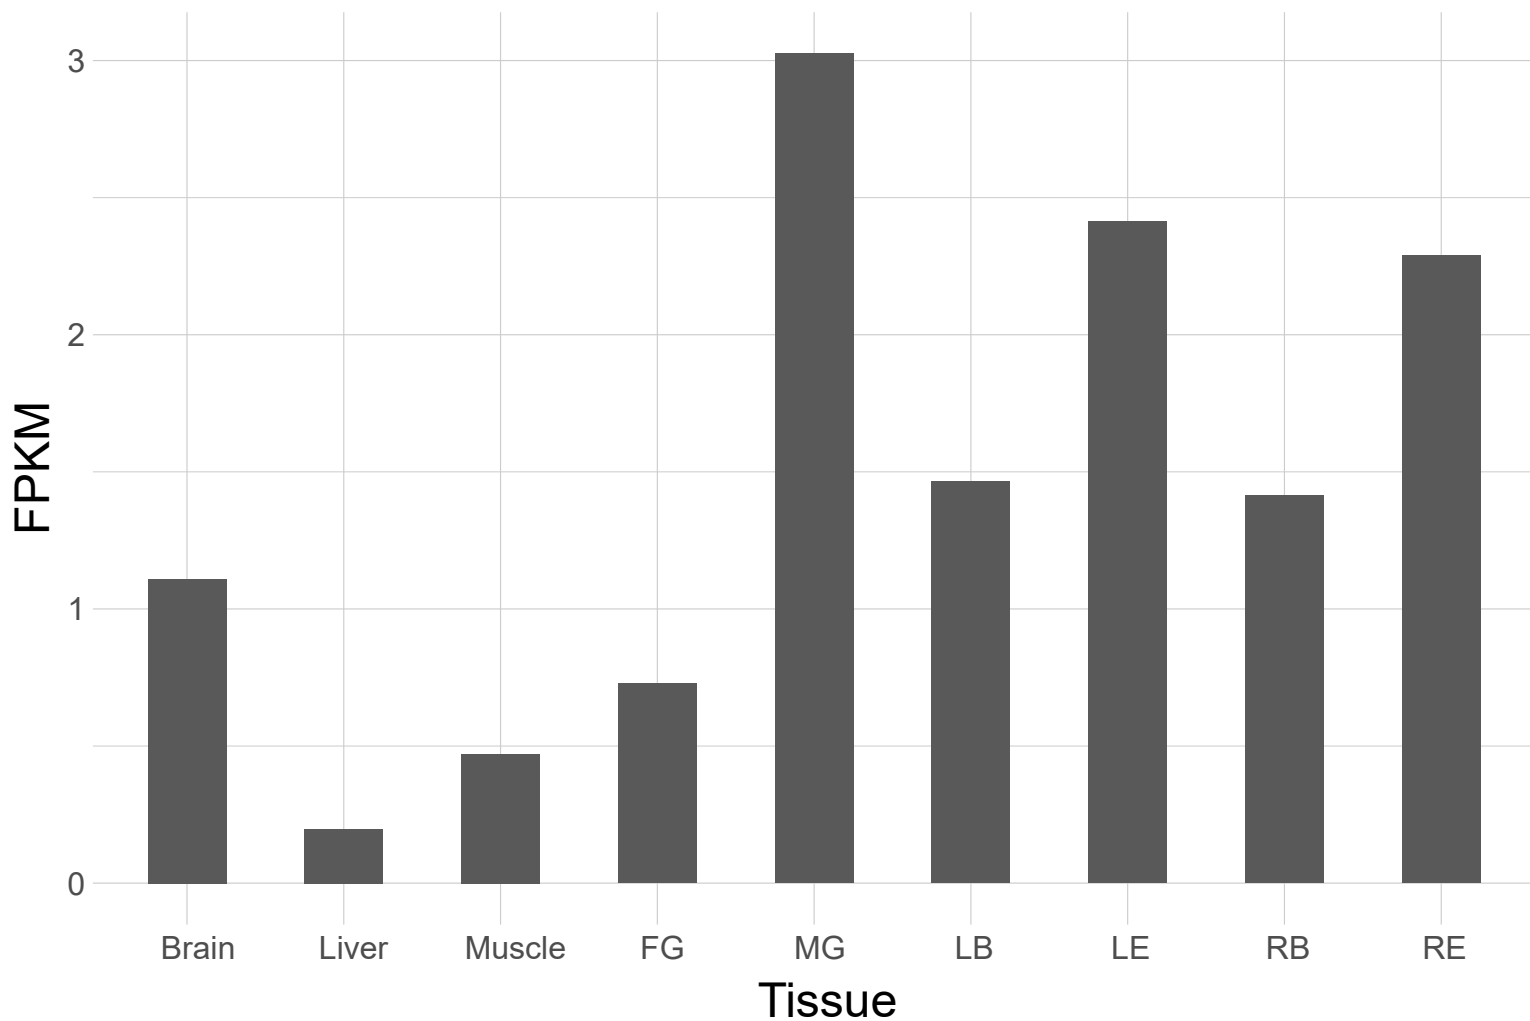

**Figure S1.** Expression profiles of gene Hic\_chr\_10.1034 in different tissues.

Supplement: s1 [file s1]
